# Supplementary material
Source: PubMed Central journal article supplement (PMC3005325)
Supplement: NIHMS245969-supplement-supplementary_information.pdf [file NIHMS245969-supplement-supplementary_information.pdf]

## **Supplementary Material**

### **Genetic analysis of radiation-induced changes in human gene expression**

Denis A. Smirnov, Michael Morley, Eunice Shin, Richard S. Spielman, Vivian G. Cheung

Supplementary Figure 1. Flowchart showing experimental steps

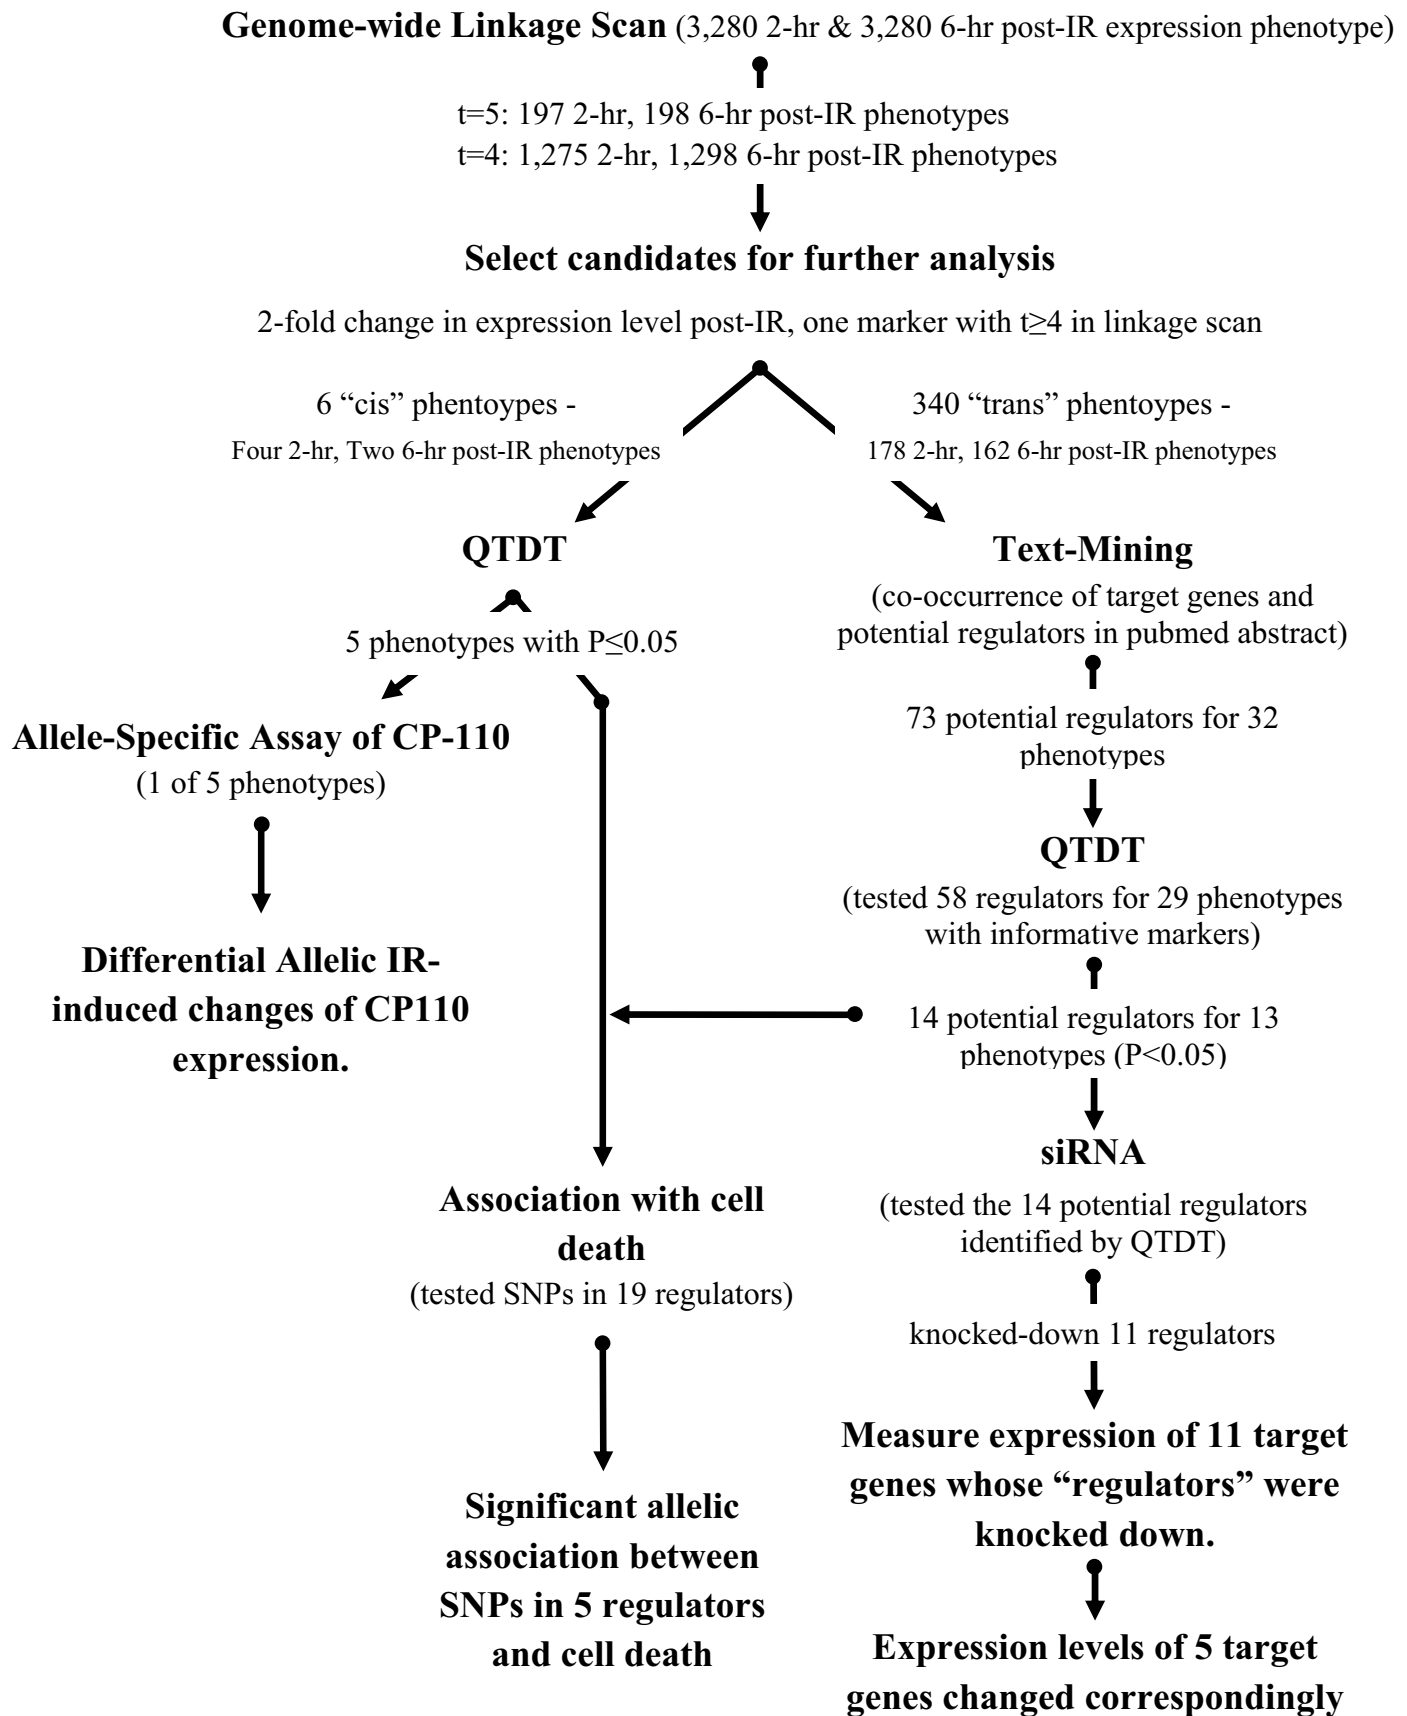

Supplementary Figure 2

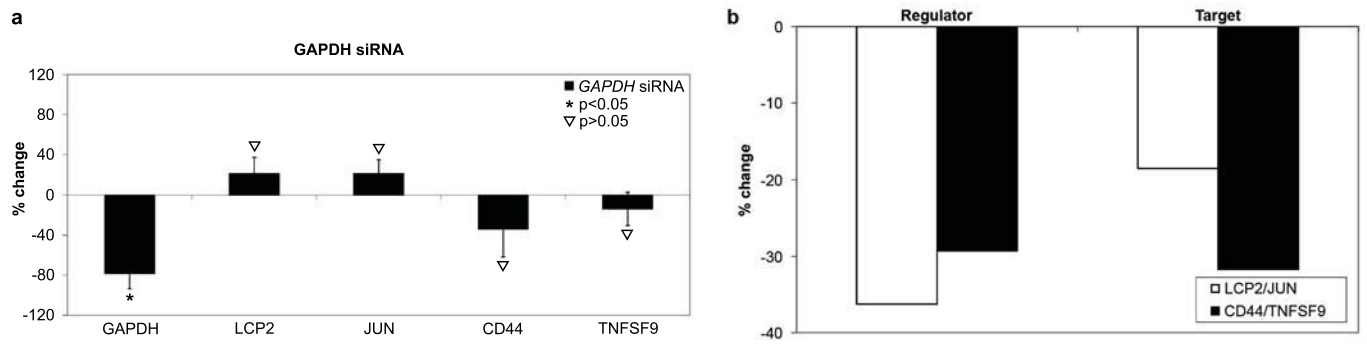

## Supplementary figure legend

Supplementary Figure 1. A flow chart of the manuscript. A brief summary of experimental approaches and results is presented.

Supplementary Figure 2. Knockdown experiments. (a) Effect of *GAPDH* siRNA transfection on expression of *GAPDH* and selected regulator and target genes. The changes in expression levels are represented as mean  $\pm$  s.e.m of 4 or more independent transfections. (b) Regulators of expression levels of IR-responsive genes were knocked down by indicated shRNAs. The changes in expression levels of the regulators and their corresponding target genes after knockdown of the regulators are shown. Data are represented as mean of 2 independent transfections.

Supplementary Table 1. SNPs in trans-acting regulators are significantly associated with expression levels of their target genes.

| Regulator | SNP              | Major allele | Target (time-point post IR) | Average Fold Change of Target Gene AA* | Average Fold Change of Target Gene AB* | Average Fold Change of Target Gene BB* | R <sup>2</sup> | P-value |
|-----------|------------------|--------------|-----------------------------|----------------------------------------|----------------------------------------|----------------------------------------|----------------|---------|
| CD44      | rs2553809<br>TC  | T            | TNFSF9<br>(2 hr)            | 2.8                                    | 2.3                                    | 1.9                                    | 0.25           | 0.005   |
| SERPINE2  | rs1377609<br>GA  | G            | ARHGDI1<br>(2 hr)           | 1.1                                    | 0.7                                    | NA                                     | 0.16           | 0.03    |
| FAS       | rs10509561<br>TA | T            | TRAF4<br>(6 hr)             | 1.8                                    | 1.5                                    | 1.3                                    | 0.16           | 0.03    |

\* A represents the major allele, and B is the minor allele.

Supplementary Table 2. PCR primers for RT-PCR analysis

| <b>Primer Name</b>  | <b>Sequence (5' to 3')</b> |
|---------------------|----------------------------|
| <i>ACTB</i> FOR     | AAGATCATTGCTCCTCCTGAGC     |
| <i>ACTB</i> REV     | CATACTCCTGCTTGCTGATCCA     |
| <i>ARHGDI1</i> FOR  | ACAAACAAGGGACCAAGTGC       |
| <i>ARHGDI1</i> REV  | CTGGCAGACACAACACGAAG       |
| <i>CD44</i> FOR     | AGTCCCTGGATCACCGACAG       |
| <i>CD44</i> REV     | TTGGTCTCTGGTAGCAGGGATT     |
| <i>FAS</i> FOR      | CCTGCTACAAATGGCAGCTT       |
| <i>FAS</i> REV      | CTTGGGGGTATGACAAGAGC       |
| <i>GAPDH</i> FOR    | CGTGGAAGGACTCATGACCA       |
| <i>GAPDH</i> REV    | CACAGTCTTCTGGGTGGCAGT      |
| <i>JUN</i> FOR      | CCACGTTAACAGTGGGTGCC       |
| <i>JUN</i> REV      | AATGTTTGCAACTGCTGCGT       |
| <i>LCP2</i> FOR     | TGATTTGTTTTTTACAGCCAAACCT  |
| <i>LCP2</i> REV     | AACTAATGAATGCCTCTGACTGACAG |
| <i>SERPINE2</i> FOR | CAAAGCTTCAGCAGCAACAACCT    |
| <i>SERPINE2</i> REV | GGAGGCGATGATCTTGCAAT       |
| <i>SSB</i> FOR      | CCTGCATCCAAACAACAGAA       |
| <i>SSB</i> REV      | CCGCAAACAAAAGTCGTTTA       |
| <i>TNFSF9</i> FOR   | CTGGTGGCCCAAATGTTCT        |
| <i>TNFSF9</i> REV   | GGTCACTGTACCAGCTCAGGG      |
| <i>TRAF4</i> FOR    | CTTCTTGGGTAGGGCAGACA       |
| <i>TRAF4</i> REV    | ATGGCTCTTGGGACATAGCA       |

Supplementary Table 3. siRNA oligonucleotides used in knockdown experiments

| Gene Symbol | Genebank ID  | siRNA ID    | Location | Sequence             |
|-------------|--------------|-------------|----------|----------------------|
| LCP2        | NM_005565    | A-012120-13 | ORF      | GUGGUACGUUUCUUAUAUU  |
| LCP2        | NM_005565    | A-012120-14 | 3'-UTR   | GCAAUAAUUUAAGAGGCUU  |
| LCP2        | NM_005565    | A-012120-15 | 3'-UTR   | UUAUUCUUCUUCAAUGUUU  |
| LCP2        | NM_005565    | A-012120-16 | 3'-UTR   | GUUUUAUACAUGUAAUUUG  |
| CD44        | NM_001001392 | A-009999-14 | ORF      | CUCUGAGCAUCGGAUUUGA  |
| CD44        | NM_001001392 | A-009999-15 | 3'-UTR   | CCAUUCACCUUUUAUGUUAU |
| CD44        | NM_001001392 | A-009999-16 | 3'-UTR   | CCUUUGAUCAGUAUAAUUU  |
| CD44        | NM_001001392 | A-009999-17 | 3'-UTR   | CYGUUAUAUCAGAGGAGUA  |
| SERPINE2    | NM_006216    | A-012737-13 | ORF      | CCCCAUGAUUUUAUGGUAC  |
| SERPINE2    | NM_006216    | A-012737-14 | ORF      | CUGACAUGUUUGAUUCAUC  |
| SERPINE2    | NM_006216    | A-012737-15 | ORF      | CCAAGAAGAAUAAAGACAU  |
| SERPINE2    | NM_006216    | A-012737-16 | ORF      | CCAUGUUUCUCAUAUCUUG  |
| FAS         | NM_152876    | A-003776-14 | 3'-UTR   | GGAUGAAAGAUUAAGAUUA  |
| FAS         | NM_152876    | A-003776-15 | 3'-UTR   | CGAAAUGUUCAAUAAUGU   |
| FAS         | NM_152876    | A-003776-16 | 3'-UTR   | UUUCUAAGAUUUAAAGAUUC |
| FAS         | NM_152876    | A-003776-17 | 3'-UTR   | GUUUGGAAUUAUAAAAUUAU |
| SSB         | NM_003142    | A-006877-13 | ORF      | UUGUUGUGUUUGAUAGCAU  |
| SSB         | NM_003142    | A-006877-14 | ORF      | GUCGUAGAUUUAAAGGAAA  |
| SSB         | NM_003142    | A-006877-15 | ORF      | UGGUGAAAUAAAUGGAUA   |
| SSB         | NM_003142    | A-006877-16 | 3'-UTR   | GAGAUUUCUUUGAAUGUAU  |

Supplementary Table 4. shRNA constructs used in knockdown experiments

**LCP2**

TRCN0000029811 **CCGGGATCGTTCATTAGCTCCGTTTCTCGAGAAACGGAGCTAATGAACGATCTTTT**

Clone ID: NM\_005565.2-937s1c1

Accession Number(s): NM\_005565.3

Region: CDS

**CD44**

TRCN0000057566 **CCGGCCAACCTCTAATGTCAATCGTTCTCGAGAACGATTGACATTAGAGTTGGTTTTTG**

Clone ID: NM\_000610.3-2215s1c1

Accession Number(s): NM\_001001390.1, NM\_001001389.1, NM\_000610.3

Region: CDS
